# Supplementary material for: Application of Epidemiological Methods in a Large-Scale Cross-Sectional Study in 765 German Dairy Herds—Lessons Learned
Source: MDPI journal article supplement (doi:10.3390/ani14091385), 2024-05-06
Supplement: s1 [file s1]

## **Overview of the areas for which data was collected**

### *Description of dairies*

General: farm structure, management, handling of cows

DHI-farms: data from monthly milk recordings from the last 12 months from all cows

non-DHI farms: collection of key figures from on farm documentation

HI-Tier data: data of animals on farm during the last 12 months

Future prospects of the farm

### *Husbandry and milking system*

Layout of stalls for calves (up to 2 weeks, 3rd week of life until weaning, respectively): Type, bedding of lying areas, nesting score, hygiene, design of the barn, lighting conditions, feeding, access to water, wind protection

Layout of stalls for young animals: type of compartments, climate, lighting conditions, walking areas, lying areas, feeding areas

Layout of stalls for cows: barn compartments, climate, lighting conditions, floor, bedding areas, feeding areas, water supply, stocking density

Tie-stalls: cow comfort, type of tying, bedding, slip-resistance, dunging, measurements of cow-place

Cubicle housing: cow comfort, bedding areas, walking areas, cubicle dimensions, measurement of various barn areas

Milking system: type and equipment, personnel hygiene, milking act, cleaning and disinfection, maintenance and repair, other management

### *Animals*

Examination of calves: ear tag, dehorning sites, auscultation of lungs, chest circumference, navel, temperature, consistency of feces, hygiene score, lameness, other diagnoses, age, sex, breed

Scoring of cows tied up: ear tag, BCS, lameness score, back line, hygiene score, hock assessment, rib swelling, skin lesions, tail fractures

Scoring of cows in cubicle housing: ear tag, BCS, hygiene score, hock assessment, neck lesions, back line, tail fracture, locomotion score

Cow size: shoulder height, oblique length of the trunk

Group observation of young animals

Fecal sample / tank milk samples for parasitological examination

### *Feeding*

Hay production, silage production

Feeding (ration design)

Gross sensory examination of hay and silage

Feed analysis of samples of currently fed forages

*Animal management*

Calves: calving, stables, hygiene measures, colostrum supply, assessment of milk replacer

Pasture management

Biosecurity: structural solutions, hygiene in the animal area, purchasing and moving animals

Personality of the interviewee

*Animal health, limb and udder health:*

Health: around calving, measures to detect, prevent and treat diseases, vaccinations, parasite control, on farm documentation of diseases,

Diseases: observed diseases in the last 12 months, lameness observations, routine hoof care, mastitis therapy, dry-off management, udder health
