# Supplementary material for: Application of Epidemiological Methods in a Large-Scale Cross-Sectional Study in 765 German Dairy Herds—Lessons Learned
Source: MDPI journal article supplement (doi:10.3390/ani14091385), 2024-05-06
Supplement: s1 [file s1]

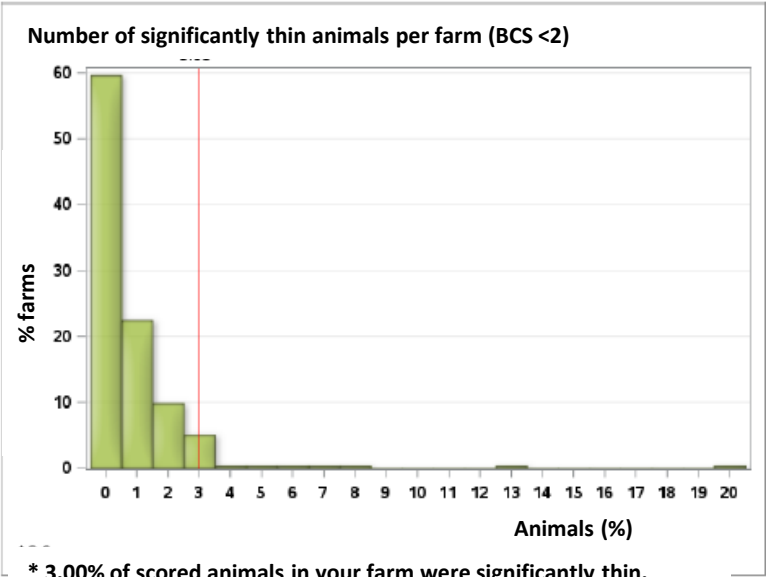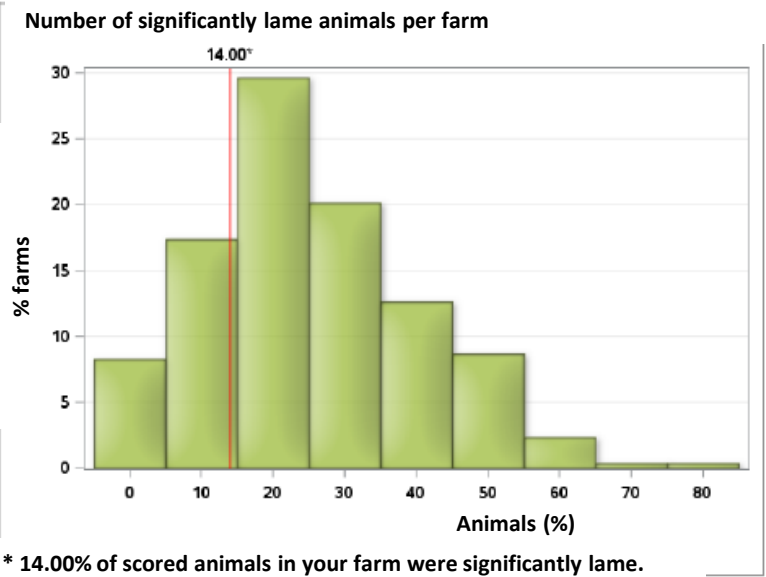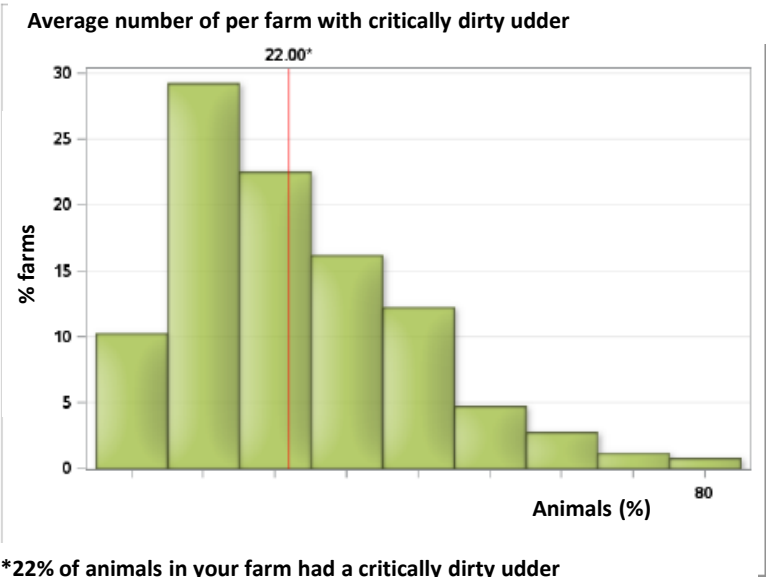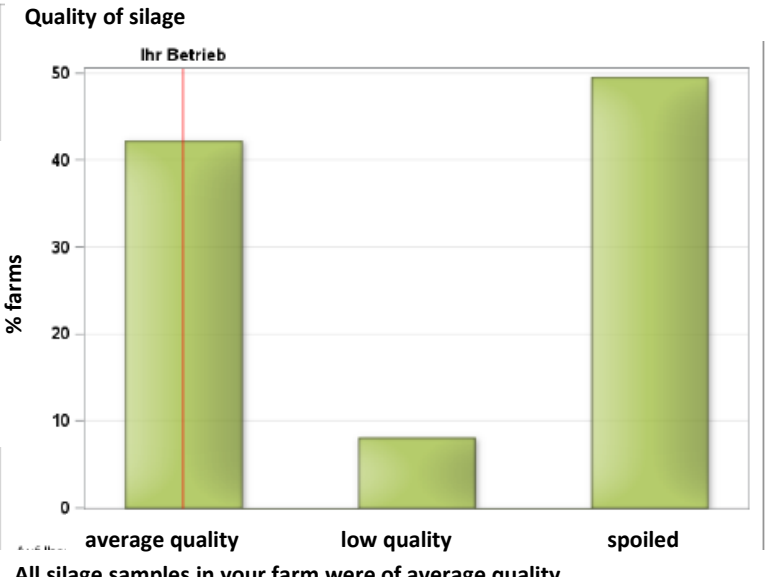

Animal-feedingplace-ratio in lactating cows

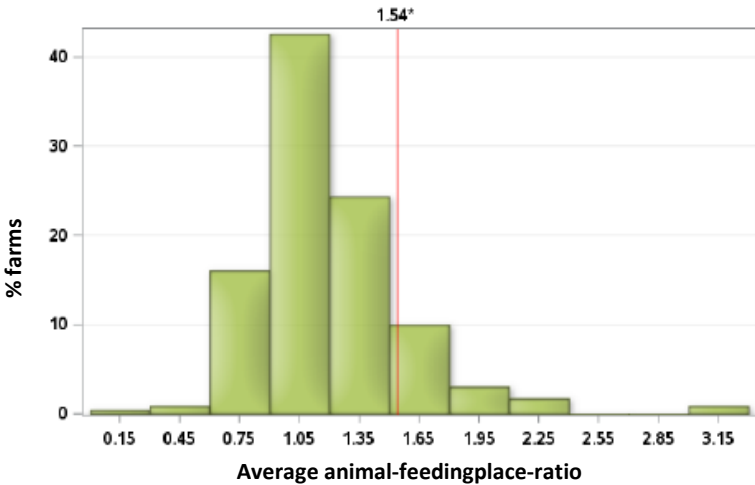

\*1.54 in your farm

Animal-drinker-ratio in lactating cows

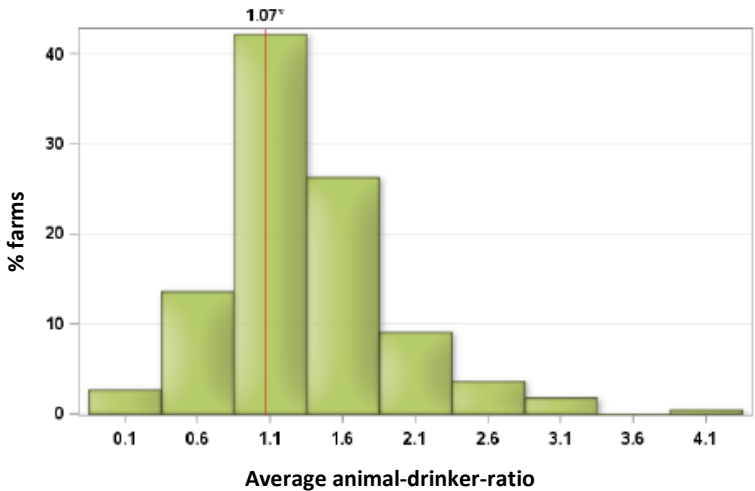

\*1.07 in your farm

Mean percentage of animals with udder infection (SCC > 100,000 cells/ml milk)

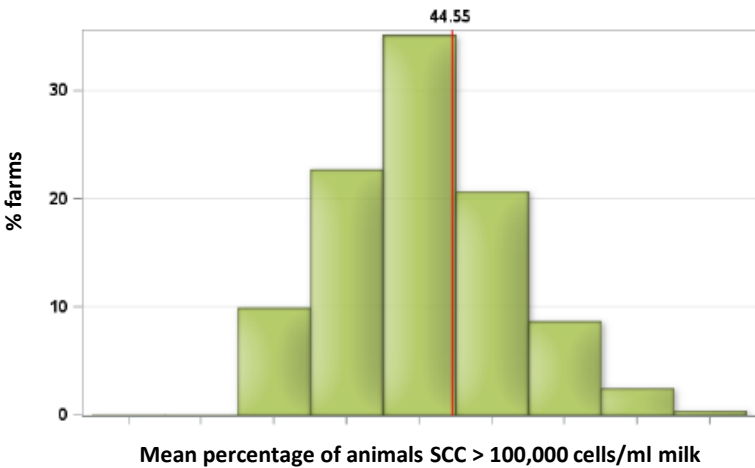

\*44.55% in your farm

Percentage of dead borne calves

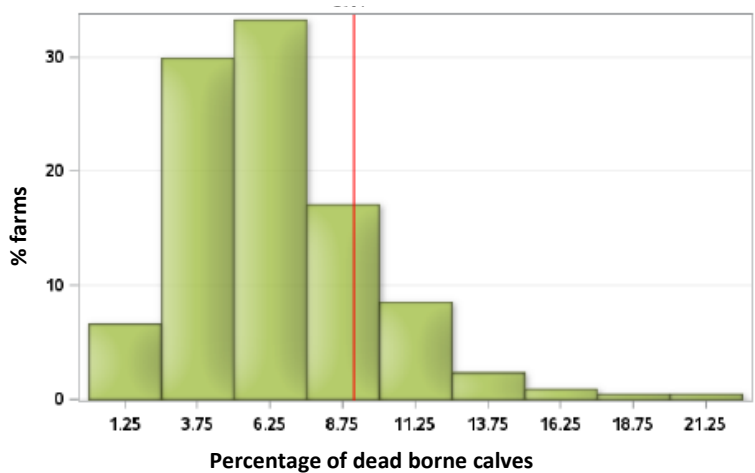

\*9.14% in your farm
