# Supplementary material for: Application of Epidemiological Methods in a Large-Scale Cross-Sectional Study in 765 German Dairy Herds—Lessons Learned
Source: MDPI journal article supplement (doi:10.3390/ani14091385), 2024-05-06
Supplement: s1 [file s1]

## Descriptive evaluations operation ID\_xxx

Company visit on: **01.01.2018**

Animals scored: **Cows: 164**

**Calves: 34**

⇒ Originally scored were: 166 cows and 34 calves  
(2 cows were accidentally noted with the same ear tag or judged twice and excluded for this evaluation).

### 1. Evaluation cows in loose housing

**Table S1: Distribution of scores skin lesions hocks, skin lesions neck, skin lesions back and tail fractures (number of animals and in percent).**

|                       | Number of cows<br>(n)<br>164 | %    | Target<br>values |
|-----------------------|------------------------------|------|------------------|
| <b>Ankle joints</b>   |                              |      |                  |
| No change             | 38                           | 23,2 | > 95%            |
| Hairless areas        | 121                          | 73,8 | < 5%             |
| Swelling              | 4                            | 2,4  | 0%               |
| Wound                 | 0                            | 0,0  | 0%               |
| Wound with swelling   | 0                            | 0,0  | 0%               |
| Not rated             | 1                            | 0,6  |                  |
| <b>Neck</b>           |                              |      |                  |
| No change             | 87                           | 53,0 |                  |
| Hairless areas        | 70                           | 42,7 |                  |
| Wound and/or swelling | 7                            | 4,3  |                  |
| Not rated             | 0                            | 0,0  |                  |
| <b>Back</b>           |                              |      |                  |
| No change             | 149                          | 90,9 |                  |
| Hairless areas        | 15                           | 9,1  | < 1%             |
| Wound and/or swelling | 0                            | 0,0  | 0%               |
| Not rated             | 0                            | 0,0  |                  |
| <b>Tail breaks</b>    |                              |      |                  |
| No tail break         | 105                          | 64,0 |                  |
| Tail hernia           | 57                           | 34,8 |                  |
| Tail amputated        | 2                            | 1,2  |                  |
| Not rated             | 0                            | 0,0  |                  |

**Table S2: Hygiene score of the udder and lower legs (number of animals and percentage)**

| Score        | Udder<br>(n = 164) | %    | Target | lower legs<br>(n = 164) | %    | Target  |
|--------------|--------------------|------|--------|-------------------------|------|---------|
| Clean        | 106                | 64,6 |        | 42                      | 25,6 |         |
| Rather clean | 54                 | 32,9 |        | 91                      | 55,5 |         |
| Rather dirty | 6                  | 3,7  | } < 5% | 30                      | 18,3 | } ≤ 25% |
| Dirty        | 0                  | 0,0  |        | 1                       | 0,6  |         |
| n.a.         | 0                  |      |        | 0                       |      |         |

**Figure S1: Distribution of the locomotion scores within the sample (n = 164; number of animals and percentage).**

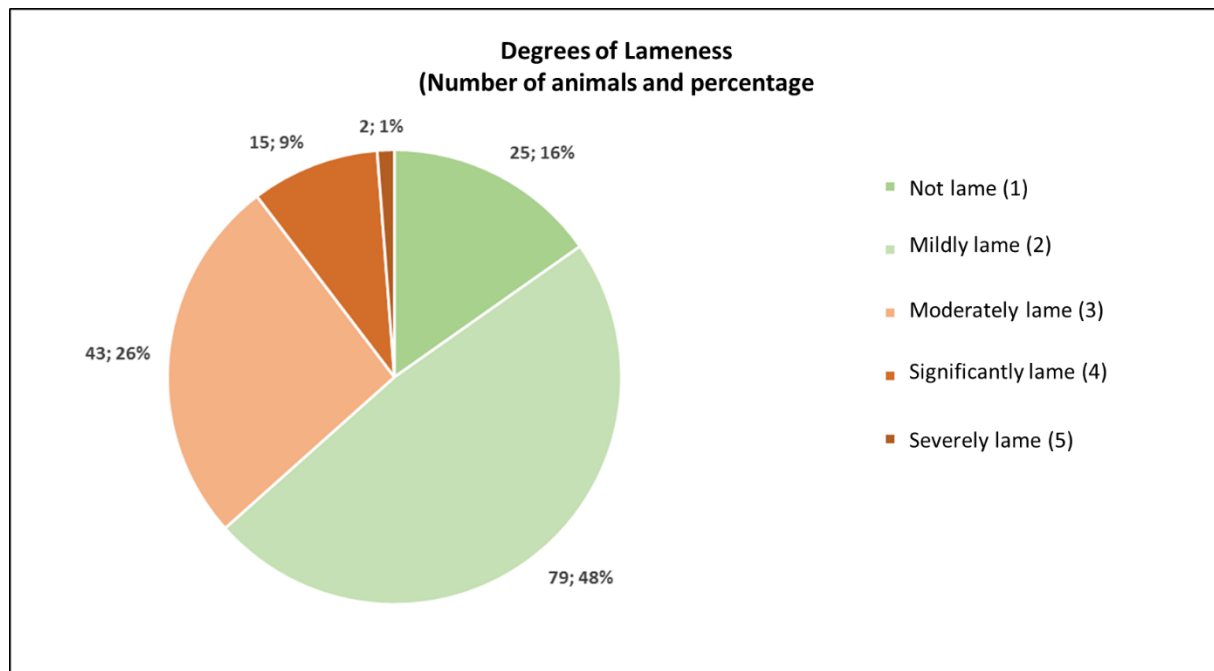

**Table S3: Percentage distribution of the locomotion scores within the individual performance groups.**

| Power group | Animals<br>evaluated<br>(number<br>n) |   | Lameness level |    |    |    |    |
|-------------|---------------------------------------|---|----------------|----|----|----|----|
|             |                                       |   | 1              | 2  | 3  | 4  | 5  |
| Total       | 164                                   | n | 25             | 79 | 43 | 15 | 2  |
|             |                                       | % | 15             | 48 | 26 | 9  | 1  |
| Group 21    | 36                                    | % | 11             | 50 | 28 | 8  | 3  |
| Group 22    | 38                                    | % | 24             | 55 | 13 | 8  | 0  |
| Group 23    | 36                                    | % | 17             | 47 | 31 | 6  | 0  |
| Group 24    | 38                                    | % | 11             | 47 | 24 | 18 | 0  |
| TSF         | 12                                    | % | 17             | 25 | 58 | 0  | 0  |
| TSS         | 4                                     | % | 0              | 50 | 25 | 0  | 25 |

**Figures S2 a-f:** Graphical representation of the distribution of the locomotion scores within individual performance groups with at least 4 animals (number of animals).

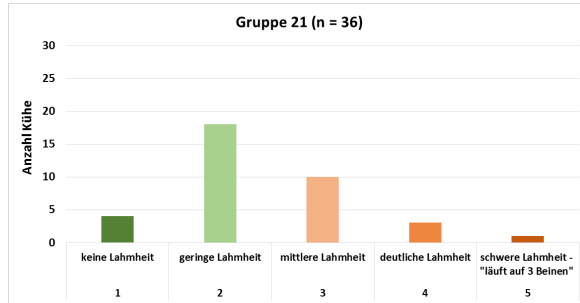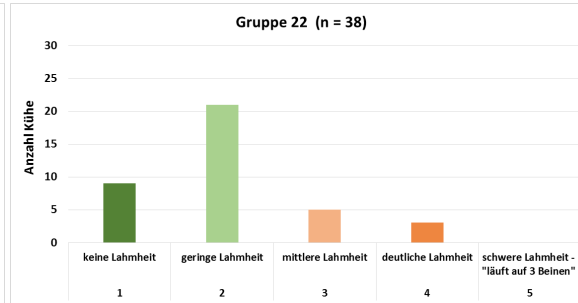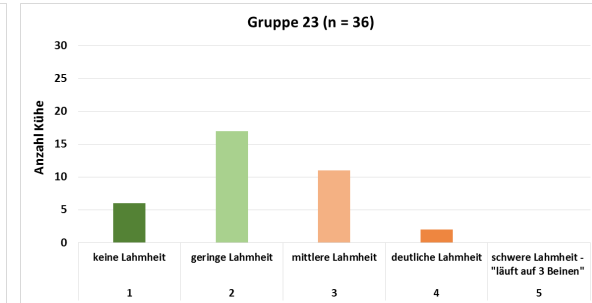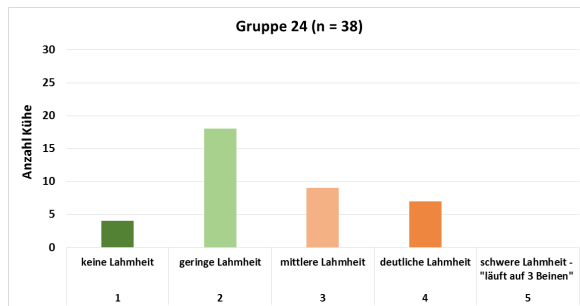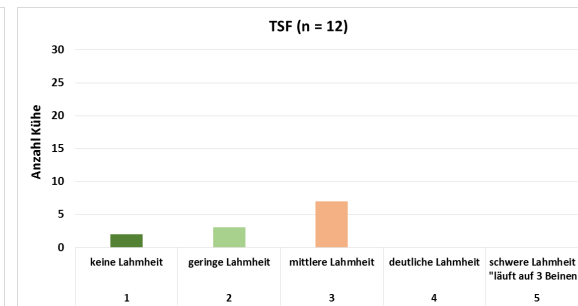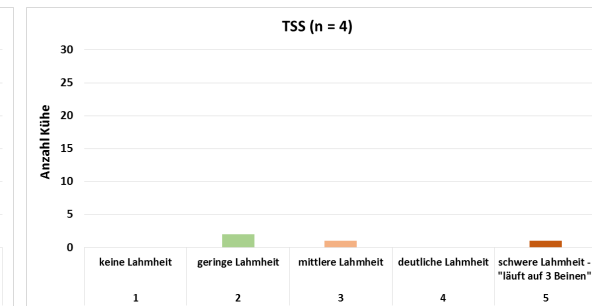

**Figure S3: Distribution of body condition scores (BCS scores) in relation to lactation day (n = 126).**

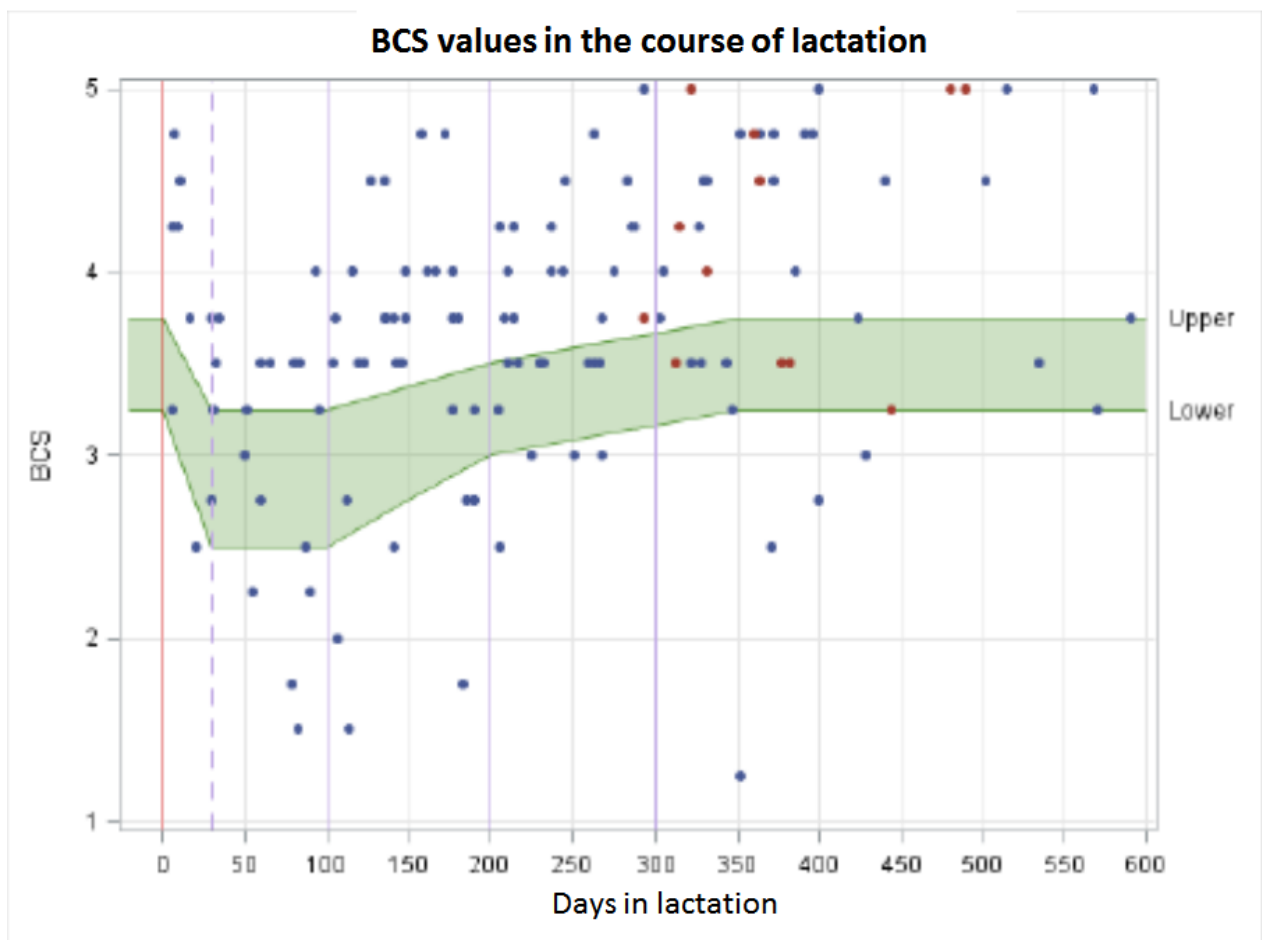

Note: The verticals (red, purple) indicate the lactation thirds assuming an average lactation duration of 300 days. Points: blue, lactating; red, dry stallion.

**Table S4: Overview of body condition distribution by lactation days (number of animals and percentage) (n = 126).**

| Performance group           | rather thin       |           | optimal           |           | rather thick      |           |
|-----------------------------|-------------------|-----------|-------------------|-----------|-------------------|-----------|
|                             | Number of animals | %         | Number of animals | %         | Number of animals | %         |
| <b>Total</b>                | <b>14</b>         | <b>11</b> | <b>39</b>         | <b>31</b> | <b>73</b>         | <b>58</b> |
| 0 - 30. lactation day       | 2                 | 22        | 3                 | 33        | 4                 | 44        |
| 31 - 150th day of lactation | 6                 | 17        | 8                 | 22        | 22                | 61        |
| 151 - 200 lactation day     | 1                 | 8         | 5                 | 38        | 7                 | 54        |
| 201 - 350. lactation day    | 1                 | 3         | 15                | 42        | 20                | 56        |
| 351 - 600th lactation day   | 4                 | 20        | 4                 | 20        | 12                | 60        |
| Dry riser                   | 0                 | 0         | 4                 | 33        | 8                 | 67        |

**A total of 40 cows could not be included in the evaluation for the distribution of body condition by lactation days due to one or more of the exclusion criteria listed below:**

- Ear tag numbers did not match those present on the farm
- Cows were accidentally noted with the same ear tag number and removed for this evaluation, since a correct assignment to the lactation day was not possible
- no indication regarding days in milk (no previous calving date)
- Cows were other breed than SBT/RBT
- Cows were in milk > 600 days

**Table S5: Overview of the body condition of lactating and dry cows with more than 600 days post partum**

| Compartment | Ear tag | Body condition (score) | Days post partum |
|-------------|---------|------------------------|------------------|
| Group 00    | xxxxx   | rather thick (5,0)     | 720              |

## 2. evaluation calves

**Figure S4: Overview of calf weight in relation to age**

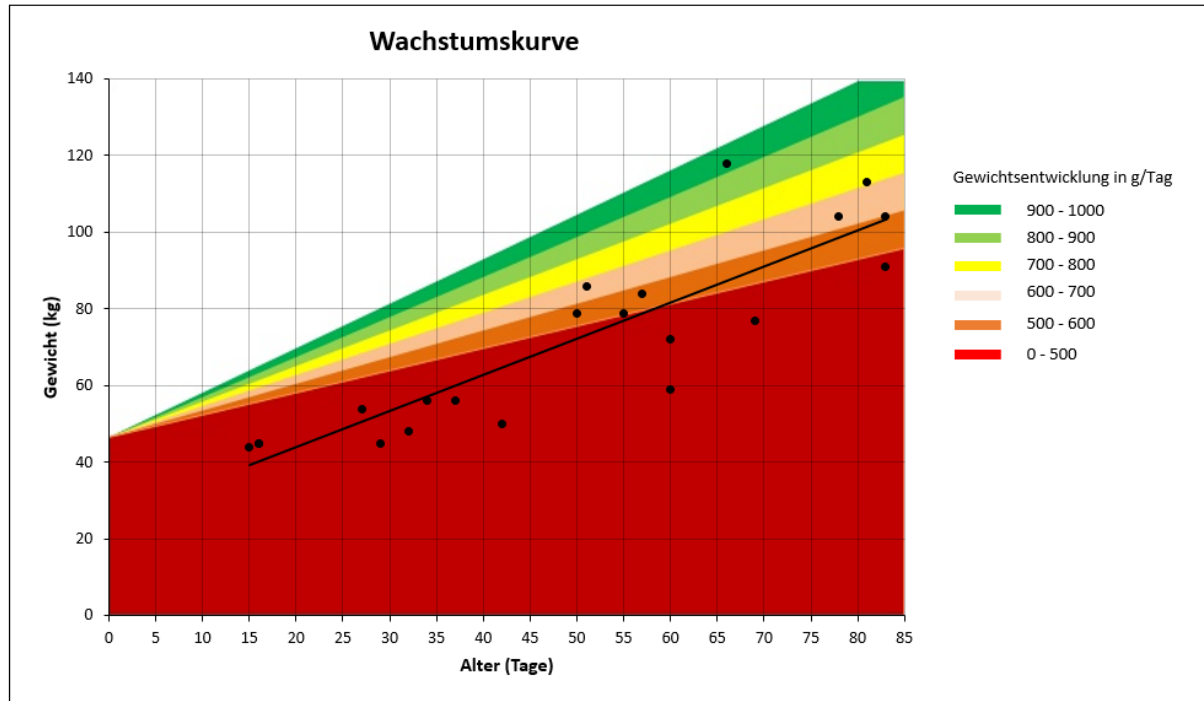

**Based on data from 21 calves.**

### Exclusion Criteria:

- 2 calves without 'match' (missing match with ear tags of the herd register and therefore no information regarding age).
- 3 calves were other breed than SBT/RBT
- 3 calves were younger than 8 days
- 5 calves were older than 85 days

If the chest circumference is < 75 cm and the age is less than 8 days or more than 85 days, the relationship of chest circumference to body weight is not reliable.

The following calves had weight development of less than 500g per day (weight development was calculated assuming an average birth weight of 40kg): xxxx, yyyy, zzzz.

**Table S6: Overview of the parameters collected from the calves and their classification (number of animals and percentage).**

| Parameter                | Assessment levels               | Number of calves | Proportion of calves (%) |
|--------------------------|---------------------------------|------------------|--------------------------|
| <b>Gender</b>            |                                 | <b>32</b>        |                          |
|                          | female                          | 32               | 94,1                     |
|                          | male                            | 0                | 5,9                      |
| <b>Dehorning</b>         |                                 | <b>34</b>        |                          |
|                          | without any particular findings | 25               | 73,5                     |
|                          | purulent secretion              | 5                | 14,7                     |
|                          | not dehorned                    | 4                | 11,8                     |
| <b>Auscultation</b>      |                                 | <b>34</b>        |                          |
| Findings, general:       | Breathing normally              | 20               | 58,8                     |
|                          | exacerbated breathing           | 14               | 41,2                     |
|                          | attenuated breathing            | 0                | 0,0                      |
| Findings, detailed:      | Background noise                | 0                | 0,0                      |
|                          | Tube breathing                  | 0                | 0,0                      |
| <b>Navel</b>             |                                 | <b>34</b>        |                          |
|                          | without any particular findings | 27               | 79,4                     |
|                          | Inflammation                    | 7                | 20,6                     |
| <b>Fecal consistency</b> |                                 | <b>34</b>        |                          |
|                          | normal                          | 28               | 82,4                     |
|                          | Diarrhea                        | 5                | 14,7                     |
|                          | Not judged                      | 1                | 2,9                      |
| <b>Hygiene</b>           |                                 | <b>34</b>        |                          |
|                          | rather clean                    | 29               | 85,3                     |
|                          | Slightly dirty                  | 5                | 14,7                     |
|                          | Highly contaminated             | 0                | 0,0                      |
| <b>Lameness</b>          |                                 | <b>34</b>        |                          |
|                          | Not lame                        | 34               | 100,0                    |
|                          | uneven load                     | 0                | 0,0                      |

**Other abnormalities on the day of the site visit:**

- 2 calves had fever (ear tag 26230, 26226)
- 3 calves had cough (ear tags 26242, 26254, 20202).
- 1 calf had an umbilical hernia (ear tag 26236) and one had an umbilical abscess (ear tag 26201).
- 2 calves had bloody diarrhea (ear tag 26260, 26254).
- 2 calves showed maggot infestation after dehorning (eartag 26245, 26248).



- 1 calf exhibited circumferential growths: Neck, ventral and lateral to head left (ear tag 26216).
